# Supplementary material for: Dengue Infection in Children in Fortaleza, Brazil: A 3-Year School-Based Prospective Cohort Study
Source: PubMed Central journal article supplement (PMC7356456; doi:10.4269/ajtmh.19-0521), 2020-04-27
Supplement: tpmd190521.SD1.pdf [file tpmd190521.SD1.pdf]

## **SUPPLEMENTARY MATERIAL**

### **Symptoms at onset and initial visit**

The median time between fever onset (when fever was the first symptom) and the *ad-hoc* visit was 2 days (range 0–11 days) for all suspected dengue cases (N = 401). When symptoms other than fever were considered to mark the onset of illness, the median time between the onset of this symptom and the visit was 2 days (range 0–28 days).

The reported clinical symptoms representative of the initial visit are described in **Supplementary Table 1** for the following subgroups: laboratory-confirmed cases based on virological and serological criteria, laboratory-confirmed cases (virological and serological criteria) coupled with a Nab profile evocative of dengue exposure, laboratory-confirmed and laboratory- probable cases with a Nab profile evocative of dengue exposure, and cases considered negative for acute dengue infection.

The prevalence of symptoms was compared between children who had no laboratory evidence of dengue infection (negatives), and children confirmed as dengue-infected by RT-qPCR or IgM seroconversion (**Supplementary Table 1**).

**Supplementary Table 1.** Clinical presentations of study participants at their initial medical visit for suspected dengue, stratified by dengue case category.

|                                                           | All laboratory-confirmed episodes<br>(N = 57) | Confirmed episodes*<br>(N = 35) | Confirmed and probable episodes†<br>(N = 59) | Negatives<br>(N = 340) |
|-----------------------------------------------------------|-----------------------------------------------|---------------------------------|----------------------------------------------|------------------------|
| Characteristics                                           | n (%)                                         | n (%)                           | n (%)                                        | n (%)                  |
| Headache                                                  | 43 (75.4)                                     | 28 (80.0)                       | 47 (79.7)                                    | 260 (76.5)             |
| Retroorbital pain                                         | 22 (38.6)                                     | 13 (37.1)                       | 20 (33.9)                                    | 70 (20.6)              |
| Myalgia                                                   | 29 (50.9)                                     | 16 (45.7)                       | 22 (37.3)                                    | 120 (35.3)             |
| Joint pain                                                | 10 (17.5)                                     | 5 (14.3)                        | 8 (13.6)                                     | 28 (8.2)               |
| Chills                                                    | 7 (12.3)                                      | 3 (8.6)                         | 5 (8.5)                                      | 29 (8.5)               |
| Rash                                                      | 3 (5.3)                                       | 2 (5.7)                         | 3 (5.1)                                      | 7 (2.1)                |
| Itching                                                   | 8 (14.0)                                      | 7 (20.0)                        | 10 (17.0)                                    | 4 (1.2)                |
| <b>At least one digestive sign among first symptoms</b>   | <b>37 (64.9)</b>                              | <b>23 (65.7)</b>                | <b>37 (62.7)</b>                             | <b>209 (61.5)</b>      |
| Abdominal pain                                            | 16 (28.1)                                     | 8 (22.9)                        | 14 (23.7)                                    | 123 (36.2)             |
| Nausea or vomiting                                        | 28 (49.1)                                     | 18 (51.4)                       | 28 (47.5)                                    | 148 (43.5)             |
| Diarrhea                                                  | 9 (15.8)                                      | 4 (11.4)                        | 7 (11.9)                                     | 77 (22.7)              |
| <b>At least one respiratory sign among first symptoms</b> | <b>31 (54.4)</b>                              | <b>15 (42.9)</b>                | <b>29 (49.2)</b>                             | <b>193 (56.7)</b>      |
| Cough                                                     | 20 (35.1)                                     | 8 (22.9)                        | 16 (27.1)                                    | 129 (37.9)             |
| Nasal congestion                                          | 9 (15.8)                                      | 5 (14.3)                        | 8 (13.6)                                     | 90 (26.5)              |
| Sore throat                                               | 23 (40.4)                                     | 8 (22.9)                        | 15 (25.4)                                    | 93 (27.4)              |
| Dyspnea                                                   | – (–)                                         | – (–)                           | 2 (3.4)                                      | 13 (3.8)               |
| <b>At least one hemorrhagic sign among first symptoms</b> | <b>4 (7.0)</b>                                | <b>2 (5.7)</b>                  | <b>4 (6.8)</b>                               | <b>10 (2.9)</b>        |
| Petechia                                                  | 3 (5.3)                                       | 2 (5.7)                         | 2 (3.4)                                      | 3 (0.9)                |
| Purpura/ecchymosis                                        | – (–)                                         | – (–)                           | – (–)                                        | 1 (0.3)                |
| Hematemesis                                               | 1 (1.8)                                       | – (–)                           | – (–)                                        | – (–)                  |
| Melena/hematochezia                                       | – (–)                                         | – (–)                           | 1 (1.7)                                      | 1 (0.3)                |
| Gingival bleeding                                         | – (–)                                         | – (–)                           | 1 (1.7)                                      | – (–)                  |
| Epistaxis                                                 | – (–)                                         | – (–)                           | – (–)                                        | 3 (0.9)                |
| Urinary tract bleeding                                    | – (–)                                         | – (–)                           | – (–)                                        | 1 (0.3)                |
| Unusual vaginal bleeding                                  | – (–)                                         | – (–)                           | – (–)                                        | 1 (0.3)                |
| <b>At least one other sign among first symptoms</b>       | <b>33 (57.9)</b>                              | <b>20 (57.1)</b>                | <b>34 (57.6)</b>                             | <b>184 (54.1)</b>      |
| Pallor or cool skin                                       | 2 (3.5)                                       | 1 (2.9)                         | 1 (1.7)                                      | 6 (1.8)                |
| Conjunctivitis                                            | 2 (3.5)                                       | 2 (5.7)                         | 2 (3.4)                                      | 8 (2.4)                |
| Lethargy or restlessness                                  | 3 (5.3)                                       | 2 (5.7)                         | 2 (3.4)                                      | 2 (0.6)                |
| Dizziness                                                 | 11 (19.3)                                     | 7 (20.0)                        | 8 (13.6)                                     | 48 (14.1)              |
| Thoracic pain                                             | – (–)                                         | – (–)                           | – (–)                                        | 8 (2.4)                |
| Other                                                     | 28 (49.1)                                     | 17 (48.6)                       | 30 (50.9)                                    | 160 (47.1)             |

N, number of ad-hoc visits with suspicion of dengue; n/%, number/percentage of ad-hoc visits with suspicion of dengue in a given category;

Nabs, neutralizing antibodies. \*Laboratory-confirmed episode with a profile of Nabs evocative of dengue exposure. †Laboratory-confirmed and laboratory-probable episode with a profile of Nabs evocative of dengue exposure.

**Supplementary Table 2.** Epidemiological data provided by the Ceará epidemiology surveillance on the incidence of dengue disease monitored by the public health surveillance system (through mandatory reporting) for (A) the entire pediatric population of Fortaleza and (B) the pediatric population living in the districts where most of the children followed during the present study live (Amadeu Furtado, Bela Vista, Bom Futuro, Damas, Jardim América, Montese, Parreão, Parquelândia, Pici [Parque Universitário], Rodolfo Teófilo)..

**A. Entire pediatric population of Fortaleza**

| Period                                             | 1 Jan–31 Dec 2012 |            | 1 Jan–31 Dec 2013 |            | 1 Jan–31 Dec 2014 |            |
|----------------------------------------------------|-------------------|------------|-------------------|------------|-------------------|------------|
| Age group                                          | 5–9 year          | 10–17 year | 5–9 year          | 10–17 year | 5–9 year          | 10–17 year |
| Number of confirmed dengue cases                   | 2281              | 6354       | 601               | 1493       | 283               | 923        |
| - number of DWC/DWS cases                          | DWC: 2            | DWC: 9     | DWC: 2            | DWC: 7     | DWS: 10           | DWS: 33    |
| - number of DHF/SD cases                           | DHF: 1            | DHF: 9     | DHF: 0            | DHF: 10    | SD: 1             | SD: 4      |
| - number of dengue-related deaths                  | 0                 | 0          | 0                 | 1          | 1                 | 3          |
| Size of pediatric population                       | 179,686           | 350,478    | 183,383           | 357,723    | 184,820           | 360,523    |
| Incidence of confirmed dengue cases/1,000 children | 12.694            | 18.130     | 3.277             | 4.174      | 1.531             | 2.560      |

DWC, dengue cases with complications; DHF, dengue hemorrhagic fever; DWS, dengue cases with warning signs, SD, severe dengue.

**B. Pediatric population living in selected districts of Fortaleza**

| Period                                                                                   | 1 Jan–31 Dec 2012 |            | 1 Jan–31 Dec 2013 |            | 1 Jan–31 Dec 2014 |            |
|------------------------------------------------------------------------------------------|-------------------|------------|-------------------|------------|-------------------|------------|
| Age group                                                                                | 5–9 year          | 10–17 year | 5–9 year          | 10–17 year | 5–9 year          | 10–17 year |
| Number of confirmed dengue cases reported among residents of Fortaleza for the age group | 207               | 551        | 57                | 135        | 17                | 70         |
| - number of DWC/DWS cases                                                                | DWC: 0            | DWC: 2     | DWC: 0            | DWC: 0     | DWS: 0            | DWS: 0     |
| - number of DHF/SD cases                                                                 | DHF: 0            | DHF: 1     | DHF: 0            | DHF: 0     | SD: 0             | SD: 0      |
| - number of dengue-related deaths                                                        | 0                 | 0          | 0                 | 0          | 0                 | 0          |
| Size of pediatric population residing in selected districts for the age group            | 10,754            | 21,607     | 10,977            | 22,049     | 11,063            | 22,228     |
| Incidence of confirmed dengue cases /1,000 children                                      | 19.249            | 25.501     | 5.193             | 6.123      | 1.537             | 3.149      |

DWC, dengue cases with complications; DHF, dengue hemorrhagic fever; DWS, dengue cases with warning signs, SD, severe dengue.
